# Supplementary material for: Immunoglobulin response to Plasmodium falciparum RESA proteins in uncomplicated and severe malaria
Source: PubMed Central journal article supplement (PMC4502540; doi:10.1186/s12936-015-0799-8), 2015-07-16
Supplement: 12936_2015_799_MOESM1_ESM.pdf [file 12936_2015_799_MOESM1_ESM.pdf]

Additional file 1

1. RESA1-PFA0110W 1 M R P P H A Y S W I E S Q D Y M G T K N V K N K N P M I Y S D D E B K R R N E N K S P L V L C S K R G V L P L I G L L Y L L L N C N L G V N G S S S G V O  
2. P1  
3. P2  
4. RESA2-PF11\_0512 M K Q H S S Y R M Y F S K N Y L Y I R D I K A K N T T L Y F P F O E K O N K N K S F L K H L C S K R F L V P L L G L Y L L I N Y N E T Y S G N S T C R L O  
5. P3  
6. P4  
7. RESA3-PF11\_0509 M K P Y S S S S A P S K Q Y M G T K N S V R A K N P T I Y S F E B K R O N P N H S L L F L S L C S K R I L V L P L I G L L Y L L I N G N F G C N G S S N S G A O  
8. P5  
9. P6  
10. PCI  
... [The rest of the file contains similar sequences for various protein variants and domains, with residue numbers 90, 160, 240, 320, 400, 480, 560, 640, 720, 800, 880, 960, 1,040, 1,120 indicated.]
